# Supplementary material
Source: HighWire-hosted journal article supplement (https://bmjopen.bmj.com/content/15/3/e089447)
Supplement: inline-supplementary-material-1 [file inline-supplementary-material-1.pdf]

## Supplement

### Text Preparation

Documents were prepared for analysis following Centres for Medicare and Medicaid Services guidelines (2010) prior to using readability calculators(1). Incomplete sentences were removed, with full stops added to the end of any headings and complete sentence bullet points. URLs were replaced with the word “website’. Midsentence full stops e.g. “U.K.” were removed. In addition, text based tables using characters, most commonly ‘x’ to indicate trial interventions at different time points were removed.

### Excluded PIS/ICFs.

| Trial Name | Document date | Document Version | Sponsor                                                  | Study Design                                     | Study Phase | Exclusion Reason                                     |
|------------|---------------|------------------|----------------------------------------------------------|--------------------------------------------------|-------------|------------------------------------------------------|
| ABRA       | 06/03/2023    | 5.0              | University of Oxford<br>(AstraZeneca Unrestricted Grant) | Randomised, Parallel Assignment, Double blind    | II          | Non-COVID study<br>Document outside screening period |
| STARR 2    | 15/06/2017    | 1.0              | University of Oxford                                     | Randomised, Parallel Assignment, Quadruple blind | IV          | Non-COVID study<br>Document outside screening period |
| STOIC      | 13/05/2020    | 1.0              | University of Oxford                                     | Randomised, Parallel Assignment, Open label      | II          | Outpatient clinical setting                          |

Trial Summary information

| Trial Name | Document date | Document Version | Sponsor  | Study Design | Study Phase | Recruitment target | Intervention (Route of delivery) | Additional notes |
|------------|---------------|------------------|----------|--------------|-------------|--------------------|----------------------------------|------------------|
| RECOVERY   | 17/03/2020    | 1.4              | Academic | Randomised,  | III         | 50000              | Lopinavir-                       | Translations     |

|                |            |     |                                                                |                                                                                                                 |                   |       |                                                                             |                                                                        |
|----------------|------------|-----|----------------------------------------------------------------|-----------------------------------------------------------------------------------------------------------------|-------------------|-------|-----------------------------------------------------------------------------|------------------------------------------------------------------------|
|                |            |     | (University of Oxford, Oxford)                                 | Factorial assignment, Open label                                                                                | (Platform)        |       | Ritonavir (oral)<br>Interferon (inhaled)<br>Dexamethasone (Intavenous/Oral) | available.                                                             |
| REMAP-CAP      | 09/04/2020 | 1.3 | Academic (University Medical Centre, Utrecht)                  | Randomised, Adaptive Bayesian Platform Trial evaluating multiple interventions in multiple domains. Open Label. | III (Platform)    | 10000 | Multiple (Intravenous, Oral)                                                | 6 potential interventions, run concurrently based on clinical factors. |
| TACTIC-E       | 03/06/2020 | 1.1 | Academic (Cambridge University Hospitals NHS Trust, Cambridge) | Randomised, Parallel assignment, Open label                                                                     | II/III (Platform) | 1407  | EDP1815 (oral)<br>Dapagliflozen (oral)<br>Ambrisentan (oral)                | Part A / Part B format                                                 |
| TACTIC-R       | 04/05/2020 | 1.2 | Academic (Cambridge University Hospitals NHS Trust, Cambridge) | Randomised, Parallel assignment, Open label                                                                     | III (Platform)    | 1167  | Ravulizumab (Intravenous)<br>Baricitinib (oral)                             | Part A / Part B format                                                 |
| GS-US-540-5773 | 27/03/2020 | 3   | Gilead                                                         | Randomised, Parallel Assignment, Open label                                                                     | III               | 400   | Remdesevir (Intravenous)                                                    |                                                                        |
| RUXCOVID       | 23/04/2020 | 0   | Novartis                                                       | Randomized, Double-blind, Placebo-controlled                                                                    | III               | 402   | Ruxolitinib (Oral)                                                          | Offered summary sheet.                                                 |

|                 |            |     |                                                     |                                                     |     |      |                               |                                   |
|-----------------|------------|-----|-----------------------------------------------------|-----------------------------------------------------|-----|------|-------------------------------|-----------------------------------|
| ACCORD-2        | 30/04/2020 | 1.2 | Academic (University of Southampton)                | Adaptive Randomisation, Platform study, Open label. | II  | 1800 | Bemcentinib (Oral)            | Offered summary sheet.            |
| COVASE          | 24/04/2020 | 2   | Academic ( University College London Hospitals NHS) | Randomised, parallel assignment, open-label.        | II  | 50   | Dornase Alpha (nebulised)     | Offered summary sheet.            |
| ILEAD-7         | 06/05/2020 | 3   | Revimmune                                           | Randomised, Placebo, Quadruple-Blind.               | II  | 48   | Interleukin-7 (Intramuscular) | UK cohort of international study. |
| OSCAR GSK       | 01/05/2020 | 1   | GlaxoSmithKline                                     | Randomised, Placebo, Double-Blind.                  | II  | 800  | Otilimab (Intravenous)        | Offered summary sheet.            |
| SPRINTER        | 26/10/2020 | 1   | Synairgen Research Ltd.                             | Randomised, Double-Blind, Parallel Assignment.      | III | 610  | SNG001 (Inhaled)              |                                   |
| SYNAIRGEN SG016 | 13/03/2020 | 2   | Synairgen Research Ltd.                             | Randomised, Quadruple-blind Parallel Assignment.    | II  | 220  | SNG001 (Inhaled)              |                                   |
| Theravance 0188 | 18/05/2020 | 3   | Theravance Biopharma                                | Randomised, Placebo, Triple-Blind.                  | II  | 159  | TD-0903 (inhaled)             |                                   |

Page totals & Subsection Analysis

| Trial | Total Page Count |     | Privacy and Information Governance section |       | Benefits section             |       | Risks section                |       |
|-------|------------------|-----|--------------------------------------------|-------|------------------------------|-------|------------------------------|-------|
|       | PIS              | ICF | Reading time (mins, 240                    | Words | Reading time (mins, 240 wpm) | Words | Reading time (mins, 240 wpm) | Words |
|       |                  |     |                                            |       |                              |       |                              |       |

|                           |      |   |      |     |     |     |      |     |
|---------------------------|------|---|------|-----|-----|-----|------|-----|
|                           |      |   | wpm) |     |     |     |      |     |
| Phase III Platform trials |      |   |      |     |     |     |      |     |
| RECOVERY                  | 2    | 2 | 72   | 0.3 | 42  | 0.2 | 96   | 0.4 |
| REMAP-CAP                 | 8    | 2 | 661  | 2.8 | 133 | 0.6 | 328  | 1.4 |
| TACTIC-E                  | 13   | 3 | 517  | 2.2 | 41  | 0.2 | 573  | 2.4 |
| TACTIC-R                  | 9    | 3 | 519  | 2.2 | 41  | 0.2 | 255  | 1.1 |
| Phase III Commercial      |      |   |      |     |     |     |      |     |
| GS-US-540-5773            | 13   | 3 | 988  | 4.1 | 85  | 0.4 | 495  | 2.1 |
| RUXCOVID                  | 14   | 4 | 1159 | 4.8 | 40  | 0.2 | 1189 | 5.0 |
| SPRINTER                  | 12   | 2 | 490  | 2.0 | 133 | 0.6 | 636  | 2.7 |
| Phase II Trials           |      |   |      |     |     |     |      |     |
| ACCORD-2                  | 14   | 4 | 968  | 4.0 | 0   | 0   | 949  | 4.0 |
| COVASE                    | 5    | 2 | 355  | 1.5 | 41  | 0.2 | 297  | 1.2 |
| ILEAD-7                   | 10   | 2 | 331  | 1.4 | 101 | 0.4 | 287  | 1.2 |
| OSCAR GSK                 | 20   | 5 | 531  | 2.2 | 125 | 0.5 | 801  | 3.3 |
| SYNAIRGEN SG016           | 15   | 3 | 709  | 3.0 | 48  | 0.2 | 668  | 2.8 |
| Theravance 0188           | 10   | 2 | 469  | 2.0 | 41  | 0.2 | 517  | 2.2 |
| Overall                   |      |   |      |     |     |     |      |     |
| Median                    | 12.5 | 3 | 519  | 2.2 | 48  | 0.2 | 517  | 2.2 |

Plain English Criteria

| Trial Name     | Average Sentence Length (words) | Text in passive tense (%) | Avoids Capitals | Bullet Points | Avoids Underlining |
|----------------|---------------------------------|---------------------------|-----------------|---------------|--------------------|
| RECOVERY       | 20.5                            | 45%                       | Yes             | No            | Yes                |
| REMAP-CAP      | 18                              | 37%                       | Yes             | No            | Yes                |
| TACTIC-E       | 20.5                            | 42%                       | Yes             | Yes           | No                 |
| TACTIC-R       | 20.1                            | 43%                       | Yes             | Yes           | No                 |
| GS-US-540-5773 | 19.4                            | 37%                       | No              | Yes           | No                 |
| RUXCOVID       | 18.5                            | 35%                       | Yes             | Yes           | No                 |
| SPRINTER       | 20.4                            | 38%                       | No              | Yes           | No                 |
| ACCORD-2       | 19.1                            | 41%                       | Yes             | Yes           | No                 |
| ILEAD-7        | 20.6                            | 22%                       | No              | Yes           | No                 |

|                    |      |     |     |     |    |
|--------------------|------|-----|-----|-----|----|
| OSCAR<br>GSK       | 16.3 | 33% | Yes | Yes | No |
| SYNAIRGEN<br>SG016 | 18.9 | 40% | Yes | Yes | No |
| Theravance<br>0188 | 18   | 40% | No  | Yes | No |



1. Toolkit for Making Written Material Clear and Effective - Part 7 : Using readability formulas: A cautionary note [Internet]. U.S. Department of Health and Human Services Centers for Medicare & Medicaid Services; 2010. Available from: <https://montefioreeinstein.org/documents/ToolkitPart07.pdf>
